# Supplementary material
Source: Springer Nature journal article supplement (https://www.springermedizin.de/resource/supplementary/13256_2007_312_MOESM3_ESM.pdf/9645702)

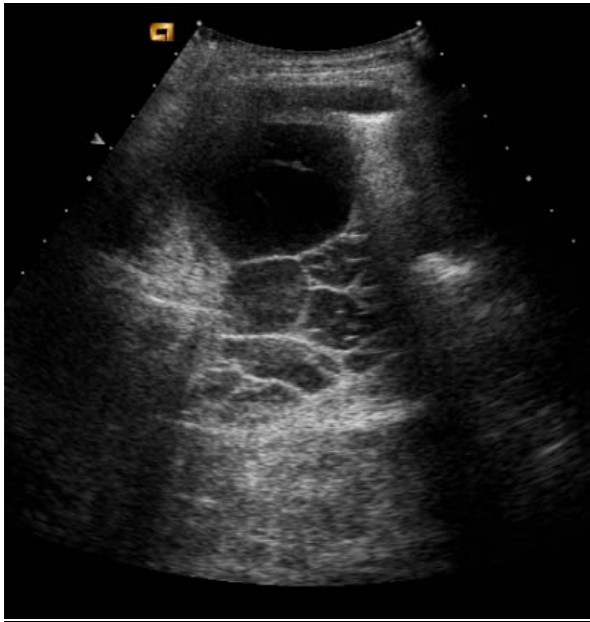

Supplement: MOESM3 [file 9645702]
